# Supplementary material for: GenBio-MAPS as a Case Study to Understand and Address the Effects of Test-Taking Motivation in Low-Stakes Program Assessments
Source: Atypon-hosted journal article supplement (doi:10.1187/cbe.20-10-0243), 2021-04-02
Supplement: combinedsupmats.pdf [file combinedsupmats.pdf]

# Supplemental Material

*CBE—Life Sciences Education*

Uminski and Couch

# GenBio-MAPS as a case study to understand and address the effects of test-taking motivation in low-stakes program assessments

Crystal Uminski & Brian A. Couch

## Supplementary Materials – Table of contents

|                                                                                                                                                                                          |    |
|------------------------------------------------------------------------------------------------------------------------------------------------------------------------------------------|----|
| Supplemental Table 1: Institution and course demographics                                                                                                                                | 2  |
| Supplemental Table 2: Number of page times replaced                                                                                                                                      | 3  |
| Supplemental Table 3: Response time thresholds for GenBio-MAPS questions                                                                                                                 | 4  |
| Supplemental Table 4: Correlations between demographic variables, test-taking effort, and GenBio-MAPS score                                                                              | 5  |
| Supplemental Table 5: Effects of student demographic characteristics on self-reported effort                                                                                             | 6  |
| Supplemental Table 6: Effects of student demographic characteristics and self-reported effort on observed test-taking behaviors                                                          | 7  |
| Supplemental Table 7: Effects of student demographic characteristics and test-taking effort on GenBio-MAPS score                                                                         | 8  |
| Supplemental Table 8: Effects of question display order on persistence behaviors and question score                                                                                      | 9  |
| Supplemental Figure 1: Distribution of GenBio-MAPS scores from students who were removed by our dual motivation filter compared to a binomial distribution arising from random responses | 10 |

| <b>Supplemental Table 1. Institution and course demographics<sup>a</sup></b>                                                                                      |          |          |
|-------------------------------------------------------------------------------------------------------------------------------------------------------------------|----------|----------|
| <b>Institution characteristic</b>                                                                                                                                 | <b>n</b> | <b>%</b> |
| Control                                                                                                                                                           |          |          |
| Public                                                                                                                                                            | 15       | 75       |
| Private                                                                                                                                                           | 5        | 25       |
| Region <sup>b</sup>                                                                                                                                               |          |          |
| Mid-Atlantic                                                                                                                                                      | 2        | 10       |
| Midwest                                                                                                                                                           | 10       | 50       |
| Northwest                                                                                                                                                         | 3        | 15       |
| Southwest                                                                                                                                                         | 5        | 25       |
| Carnegie basic classification                                                                                                                                     |          |          |
| Associate's Colleges: Mixed Transfer/Career & Technical-High Nontraditional                                                                                       | 2        | 10       |
| Baccalaureate Colleges: Arts & Sciences Focus                                                                                                                     | 3        | 15       |
| Master's Colleges & Universities: Larger or Medium Programs                                                                                                       | 7        | 35       |
| Doctoral Universities: Higher or Moderate Research Activity                                                                                                       | 3        | 15       |
| Doctoral Universities: Highest Research Activity                                                                                                                  | 5        | 25       |
| Course time point                                                                                                                                                 |          |          |
| Beginning of introductory series                                                                                                                                  | 58       | 38       |
| End of introductory series                                                                                                                                        | 45       | 30       |
| Advanced                                                                                                                                                          | 49       | 32       |
| <sup>a</sup> Data originally collected and reported in Couch <i>et al.</i> (2019).                                                                                |          |          |
| <sup>b</sup> Region designations are based on PULSE regional boundaries. No institutions from the Northeast or Southeast regions are represented in the data set. |          |          |

| <b>Supplemental Table 2. Number of page times replaced<sup>a</sup></b> |                            |
|------------------------------------------------------------------------|----------------------------|
| <b>Number of pages replaced</b>                                        | <b>Percent of students</b> |
| 0                                                                      | 88.4                       |
| 1 - 5                                                                  | 11.5                       |
| 6 - 10                                                                 | 0.1                        |
| 10 -15                                                                 | 0                          |

<sup>a</sup> Students saw one multiple-true-false question containing 4-5 T/F statements per page. Response times to individual questions exceeding 15 minutes were replaced with the average page time of 1.5 minutes

| <b>Supplemental Table 3. Response time thresholds for GenBio-MAPS questions<sup>a</sup></b> |                                         |                           |
|---------------------------------------------------------------------------------------------|-----------------------------------------|---------------------------|
| <b>GenBio-MAPS question</b>                                                                 | <b>Number of characters in question</b> | <b>Response threshold</b> |
| BM-01                                                                                       | 855                                     | 8.55                      |
| BM-02                                                                                       | 633                                     | 6.33                      |
| BM-03                                                                                       | 875                                     | 8.75                      |
| BM-04                                                                                       | 758                                     | 7.58                      |
| BM-07                                                                                       | 717                                     | 7.17                      |
| BM-08                                                                                       | 1299                                    | 12.99                     |
| BM-12                                                                                       | 1036                                    | 10.36                     |
| BM-13                                                                                       | 937                                     | 9.37                      |
| BM-14                                                                                       | 418                                     | 4.18                      |
| BM-15                                                                                       | 1163                                    | 11.63                     |
| BM-16                                                                                       | 895                                     | 8.95                      |
| BM-18                                                                                       | 762                                     | 7.62                      |
| BM-19                                                                                       | 700                                     | 7.00                      |
| BM-20                                                                                       | 954                                     | 9.54                      |
| BM-21                                                                                       | 1172                                    | 11.72                     |
| BM-22                                                                                       | 1083                                    | 10.83                     |
| BM-23                                                                                       | 462                                     | 4.62                      |
| BM-24                                                                                       | 825                                     | 8.25                      |
| BM-27                                                                                       | 920                                     | 9.20                      |
| BM-28                                                                                       | 973                                     | 9.73                      |
| BM-30                                                                                       | 904                                     | 9.04                      |
| BM-31                                                                                       | 466                                     | 4.66                      |
| BM-32                                                                                       | 840                                     | 8.40                      |
| BM-33                                                                                       | 912                                     | 9.12                      |
| BM-35                                                                                       | 970                                     | 9.70                      |
| BM-36                                                                                       | 777                                     | 7.77                      |
| BM-37                                                                                       | 988                                     | 9.88                      |
| BM-38                                                                                       | 866                                     | 8.66                      |
| BM-40                                                                                       | 749                                     | 7.49                      |
| BM-43                                                                                       | 726                                     | 7.26                      |
| BM-44                                                                                       | 858                                     | 8.58                      |
| BM-45                                                                                       | 737                                     | 7.37                      |
| BM-49                                                                                       | 618                                     | 6.18                      |
| BM-50                                                                                       | 938                                     | 9.38                      |
| BM-54                                                                                       | 1069                                    | 10.69                     |
| BM-55                                                                                       | 1480                                    | 14.80                     |
| BM-59                                                                                       | 1344                                    | 13.44                     |
| BM-60                                                                                       | 1188                                    | 11.88                     |
| BM-61                                                                                       | 733                                     | 7.33                      |

<sup>a</sup> Response time thresholds were calculated based on a rate of 100 characters per second.

**Supplemental Table 4. Correlations between demographic variables, test-taking effort, and GenBio-MAPS score**

|                      | Gender   | Race/Ethnicity | Parental education | Language | Major    | Self-reported effort | Test completion time | Solution behavior | GenBio-MAPS score |
|----------------------|----------|----------------|--------------------|----------|----------|----------------------|----------------------|-------------------|-------------------|
| Gender               | –        | -0.01          | -0.02              | -0.02    | 0.01     | -0.00                | 0.03**               | 0.04***           | -0.12***          |
| Race/ethnicity       | -0.01    | –              | 0.19***            | 0.14***  | -0.04*** | 0.04***              | -0.04***             | 0.03**            | 0.14***           |
| Parental education   | -0.02    | 0.19***        | –                  | 0.17***  | -0.02    | -0.00                | -0.01                | 0.04***           | 0.18***           |
| Language             | -0.02    | 0.14***        | 0.17***            | –        | -0.02*   | 0.06***              | -0.02*               | 0.05***           | 0.09***           |
| Major                | 0.01     | -0.04***       | -0.02              | -0.02*   | –        | 0.05***              | 0.07***              | 0.07***           | 0.12***           |
| Self-reported effort | -0.00    | 0.04***        | -0.00              | 0.06***  | 0.05***  | –                    | 0.23***              | 0.33***           | 0.29***           |
| Test completion time | 0.03**   | -0.04***       | -0.01              | -0.02*   | 0.07***  | 0.23***              | –                    | 0.51***           | 0.30***           |
| Solution behavior    | 0.04***  | 0.03**         | 0.04***            | 0.05***  | 0.07***  | 0.33***              | 0.51***              | –                 | 0.42***           |
| GenBio-MAPS score    | -0.12*** | 0.14***        | 0.18***            | 0.09***  | 0.12***  | 0.29***              | 0.30***              | 0.42***           | –                 |

\* $p < 0.05$ ; \*\* $p < 0.01$ ; \*\*\* $p < 0.001$

**Supplemental Table 5. Standard least squares linear regression model<sup>a</sup> of the effects of student demographic characteristics on self-reported effort**

| <b>Parameter<sup>b</sup></b>                                                                    | <b>Estimate</b> | <b>SE</b> | <b>df</b> | <b>t</b> | <b>p</b>            |
|-------------------------------------------------------------------------------------------------|-----------------|-----------|-----------|----------|---------------------|
| Intercept                                                                                       | 3.203           | 0.033     | 23.69     | 96.95    | <0.0001             |
| Gender: male<br>(ref: female)                                                                   | 0.003           | 0.009     | 7536      | 0.37     | 0.7086 <sup>c</sup> |
| Race/ethnicity: underserved<br>(ref: non-underserved)                                           | -0.031          | 0.011     | 7366      | -2.92    | 0.0035              |
| Parental education: did not complete<br>bachelor's degree<br>(ref: completed bachelor's degree) | 0.020           | 0.009     | 7483      | 2.22     | 0.0263              |
| Language: English not spoken at home<br>(ref: English spoken at home)                           | -0.064          | 0.012     | 7534      | -5.18    | <0.0001             |
| Major: not majoring in biology<br>(ref: majoring in biology)                                    | -0.046          | 0.009     | 7518      | -4.81    | <0.0001             |

<sup>a</sup> Self-reported effort ~ institution + gender + race/ethnicity + parental education + language + major + time point. Only variables that passed model selection are listed.

<sup>b</sup> Estimates for nominal variables indicate the effect based on being a member of the focal group in comparison to the reference (ref) group.

<sup>c</sup> Removing this non-significant term raised AIC above the threshold for exclusion.

**Supplemental Table 6. Standard least squares linear regression models<sup>a</sup> of the effects of student demographic characteristics and self-reported effort on observed test-taking behaviors**

| Parameter <sup>b</sup>                                                                       | Solution behavior |       |       |       |        | Test completion time (minutes) |       |       |       |                     |
|----------------------------------------------------------------------------------------------|-------------------|-------|-------|-------|--------|--------------------------------|-------|-------|-------|---------------------|
|                                                                                              | Estimate          | SE    | df    | t     | p      | Estimate                       | SE    | df    | t     | p                   |
| Intercept                                                                                    | 0.612             | 0.013 | 133.3 | 47.69 | <.0001 | 13.86                          | 0.977 | 120.1 | 14.18 | <.0001              |
| Gender: male<br>(ref: female)                                                                | -0.011            | 0.002 | 7656  | -4.89 | <.0001 | -0.568                         | 0.174 | 7531  | -3.26 | 0.0011              |
| Race/ethnicity: underserved<br>(ref: non-underserved)                                        |                   |       |       |       |        | 1.081                          | 0.217 | 7146  | 4.98  | <.0001              |
| Parental education: did not complete bachelor's degree<br>(ref: completed bachelor's degree) | -0.008            | 0.002 | 7550  | -3.30 | 0.0010 | -0.029                         | 0.182 | 7406  | -0.16 | 0.8746 <sup>c</sup> |
| Language: English not spoken at home<br>(ref: English spoken at home)                        | -0.009            | 0.003 | 7636  | -2.64 | 0.0084 | 0.551                          | 0.253 | 7502  | 2.18  | 0.0294              |
| Major: not majoring in biology<br>(ref: majoring in biology)                                 | -0.009            | 0.003 | 7608  | -3.68 | 0.0002 | -0.905                         | 0.196 | 7428  | -4.61 | <.0001              |
| Time point: end of introductory series<br>(ref: beginning of introductory series)            | -0.016            | 0.005 | 5818  | -3.09 | 0.0020 | -2.741                         | 0.400 | 4854  | -6.86 | <.0001              |
| Time point: advanced series<br>(ref: end of introductory series)                             | 0.040             | 0.007 | 7426  | 5.65  | <.0001 | 4.147                          | 0.552 | 7093  | 7.51  | <.0001              |
| Self-reported effort                                                                         | 0.087             | 0.003 | 7666  | 28.81 | <.0001 | 4.564                          | 0.234 | 7542  | 19.47 | <.0001              |

<sup>a</sup> Solution behavior ~ institution + gender + race/ethnicity + parental education + language + major + time point + self-reported effort; Test completion time ~ institution + gender + race/ethnicity + parental education + language + major + time point + self-reported effort. Only variables that passed model selection are listed.

<sup>b</sup> Estimates for nominal variables indicate the effect based on being a member of the focal group in comparison to the reference (ref) group.

<sup>c</sup> Removing this non-significant term raised AIC above the threshold for exclusion.



**Supplemental Table 7. Standard least squares linear regression model of the effects of student demographic characteristics and test-taking effort on GenBio-MAPS score**

| Parameter                                                                                           | Self-reported effort |       |       |        |        | Solution behavior |       |       |       |        | Test completion time (minutes) |       |       |        |        |
|-----------------------------------------------------------------------------------------------------|----------------------|-------|-------|--------|--------|-------------------|-------|-------|-------|--------|--------------------------------|-------|-------|--------|--------|
|                                                                                                     | Estimate             | SE    | df    | t      | p      | Estimate          | SE    | df    | t     | p      | Estimate                       | SE    | df    | t      | p      |
| Intercept                                                                                           | 0.459                | 0.011 | 65.49 | 40.78  | <.0001 | 0.415             | 0.010 | 81.39 | 39.61 | <.0001 | 0.530                          | 0.009 | 27.05 | 60.69  | <.0001 |
| Gender: male<br>(ref: female)                                                                       | 0.013                | 0.001 | 7525  | 10.73  | <.0001 | 0.016             | 0.001 | 7664  | 14.09 | <.0001 | 0.014                          | 0.001 | 7663  | 12.20  | <.0001 |
| Race/ethnicity: underserved<br>(ref: non-underserved)                                               | -0.011               | 0.001 | 7542  | -7.36  | <.0001 | -0.012            | 0.001 | 7679  | -8.32 | <.0001 | -0.014                         | 0.001 | 7680  | -9.88  | <.0001 |
| Parental education: did not complete bachelor's degree<br>(ref: parent completed bachelor's degree) | -0.013               | 0.001 | 7541  | -10.79 | <.0001 | -0.012            | 0.001 | 7680  | -9.99 | <.0001 | -0.013                         | 0.001 | 7680  | -10.51 | <.0001 |
| Language: English not spoken at home<br>(ref: English spoken at home)                               | -0.014               | 0.002 | 7536  | -8.23  | <.0001 | -0.014            | 0.002 | 7676  | -8.55 | <.0001 | -0.017                         | 0.002 | 7675  | -10.06 | <.0001 |
| Major: not majoring in biology<br>(ref: majoring in biology)                                        | -0.009               | 0.001 | 7540  | -6.54  | <.0001 | -0.007            | 0.001 | 7679  | -5.92 | <.0001 | -0.008                         | 0.001 | 7678  | -5.89  | <.0001 |
| Time point [2-1]: end of introductory series<br>(ref: beginning of introductory series)             | 0.054                | 0.003 | 7444  | 19.39  | <.0001 | 0.057             | 0.003 | 7551  | 22.15 | <.0001 | 0.061                          | 0.003 | 7576  | 22.32  | <.0001 |
| Time point [3-2]: advanced series<br>(ref: end of introductory series)                              | 0.064                | 0.004 | 7542  | 16.88  | <.0001 | 0.052             | 0.004 | 7679  | 14.37 | <.0001 | 0.055                          | 0.004 | 7680  | 14.53  | <.0001 |
| Self-reported effort                                                                                | 0.038                | 0.002 | 7530  | 16.39  | <.0001 | .                 | .     | .     | .     | .      | .                              | .     | .     | .      | .      |
| Time point [2-1]*self-reported effort                                                               | 0.009                | 0.004 | 7532  | 2.60   | 0.0093 | .                 | .     | .     | .     | .      | .                              | .     | .     | .      | .      |
| Time point [3-2]*self-reported effort                                                               | 0.022                | 0.005 | 7527  | 4.48   | <.0001 | .                 | .     | .     | .     | .      | .                              | .     | .     | .      | .      |
| Solution behavior                                                                                   | .                    | .     | .     | .      | .      | 0.185             | 0.008 | 7670  | 22.71 | <.0001 | .                              | .     | .     | .      | .      |
| Time point [2-1]*solution behavior                                                                  | .                    | .     | .     | .      | .      | 0.067             | 0.011 | 7672  | 6.02  | <.0001 | .                              | .     | .     | .      | .      |
| Time point [3-2]*solution behavior                                                                  | .                    | .     | .     | .      | .      | 0.112             | 0.019 | 7665  | 5.83  | <.0001 | .                              | .     | .     | .      | .      |
| Test completion time                                                                                | .                    | .     | .     | .      | .      | .                 | .     | .     | .     | .      | 0.002                          | 0.000 | 7675  | 16.14  | <.0001 |
| Time point [2-1]*test completion time                                                               | .                    | .     | .     | .      | .      | .                 | .     | .     | .     | .      | 0.001                          | 0.000 | 7672  | 7.48   | <.0001 |
| Time point [3-2]*test completion time                                                               | .                    | .     | .     | .      | .      | .                 | .     | .     | .     | .      | -0.000                         | 0.000 | 7665  | -1.54  | 0.1228 |

. Parameter not included in the model

**Supplemental Table 8. Standard least squares linear regression models<sup>a</sup> on the effects of question display order on persistence behaviors and question score**

| <b>Model outcome variable</b> | <b>Question display order estimate<sup>b</sup></b> | <b><i>p</i></b> | <b>R<sup>2</sup></b> |
|-------------------------------|----------------------------------------------------|-----------------|----------------------|
| Question solution behavior    | -0.0109                                            | <0.0001         | 0.5072               |
| Question time (minutes)       | -0.0588                                            | <0.0001         | 0.3676               |
| Question score                | -0.0034                                            | <0.0001         | 0.3069               |

<sup>a</sup> Question solution behavior ~ student + GenBio-MAPS question + display order; Question time ~ student + GenBio-MAPS question + display order; Question score ~ student + GenBio-MAPS question + display order

<sup>b</sup> The estimate represents the change in the proportion of students using solution behavior on a question, the amount of time per question, or the proportion of correct responses as a student moves to each subsequent question.

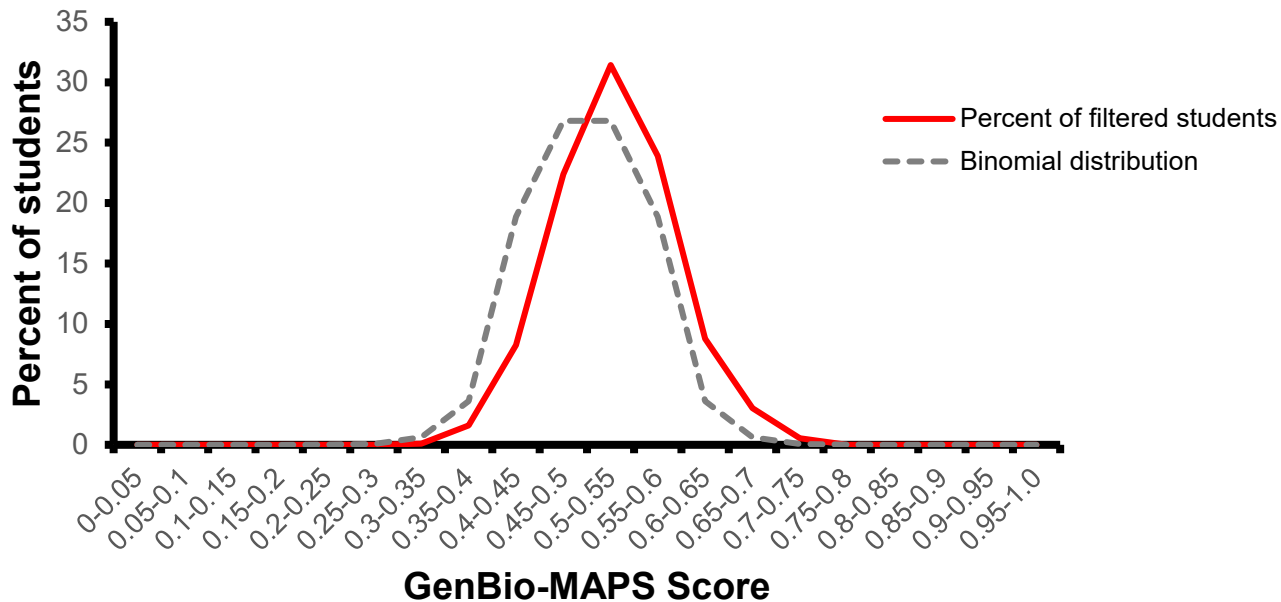

**SUPPLEMENTAL FIGURE 1.** Distribution of GenBio-MAPS scores from students who were removed by our dual motivation filter compared to a binomial distribution arising from random responses. The red line represents the scores of students removed by the dual motivation filter who had demonstrated unmotivated behavior through low solution behavior or short test completion time. The gray dotted line represents a binomial distribution based on a 50% chance of correctly responding to 67 T/F statements, which represents the average number of statements seen by filtered students.
